# Supplementary material for: Microbiome structure and function in parallel full-scale aerobic granular sludge and activated sludge processes
Source: PubMed Central journal article supplement (PMC11090927; doi:10.1007/s00253-024-13165-8), 2024-05-13
Supplement: 253_2024_13165_MOESM1_ESM.pdf [file 253_2024_13165_MOESM1_ESM.pdf]

## Supplementary Information

### *Microbiome structure and function in parallel full-scale aerobic granular sludge and activated sludge processes*

Jennifer Ekholm <sup>a</sup>, Frank Persson <sup>a</sup>, Mark de Blois <sup>b</sup>, Oskar Modin <sup>a</sup>, David J.I. Gustavsson <sup>c,d</sup>, Mario Pronk <sup>e</sup>, Mark C. M. van Loosdrecht <sup>e</sup>, Britt-Marie Wilén <sup>a,\*</sup>

<sup>a</sup> Division of Water Environment Technology, Department of Architecture and Civil Engineering, Chalmers University of Technology, Sven Hultins gata 6, SE-41296 Gothenburg, Sweden

<sup>b</sup> H2OLAND, Grindgatan 1, SE-44136 Alingsås, Sweden

<sup>c</sup> Sweden Water Research AB, Ideon Science Park, Scheelevägen 15, SE-22370 Lund, Sweden

<sup>d</sup> VA SYD, P.O. Box 191, SE-20121 Malmö, Sweden

<sup>e</sup> Department of Biotechnology, Delft University of Technology, Van der Maasweg 9, 2629 HZ Delft, The Netherlands

\* Corresponding author. Email: [britt-marie.wilen@chalmers.se](mailto:britt-marie.wilen@chalmers.se)

## Tables

**Table S1.** Influent wastewater composition average  $\pm$  standard deviation from October 2019 to September 2021, n is the number of samples.

| Parameter                              | AGS           | AGS           | CAS           | CAS           |
|----------------------------------------|---------------|---------------|---------------|---------------|
|                                        | Sep-Jun       | Jul-Aug       | Sep-Jun       | Jul-Aug       |
| BOD <sub>7</sub>                       | 97 $\pm$ 45   | 160 $\pm$ 40  | 69 $\pm$ 27   | 104 $\pm$ 13  |
| BOD <sub>7, soluble</sub> <sup>a</sup> | 30 $\pm$ 17   | 70 $\pm$ 20   | 26 $\pm$ 15   | 53 $\pm$ 6    |
| COD                                    | 250 $\pm$ 100 | 380 $\pm$ 90  | 187 $\pm$ 76  | 270 $\pm$ 44  |
| TP                                     | 2.9 $\pm$ 1.2 | 5.0 $\pm$ 1.0 | 2.7 $\pm$ 1.2 | 4.3 $\pm$ 0.6 |
| TP, soluble <sup>a</sup>               | 1.4 $\pm$ 0.6 | 2.6 $\pm$ 0.8 | 1.6 $\pm$ 1.0 | 3.1 $\pm$ 0.5 |
| TN                                     | 29 $\pm$ 13   | 51 $\pm$ 12   | 26 $\pm$ 10   | 46 $\pm$ 6    |
| NH <sub>4</sub> <sup>+</sup> -N        | 24 $\pm$ 9    | 45 $\pm$ 12   | 23 $\pm$ 9    | 37 $\pm$ 4    |
| SS                                     | 130 $\pm$ 70  | 160 $\pm$ 60  | 80 $\pm$ 20   | 80 $\pm$ 20   |
| BOD <sub>7</sub> / TN                  | 3.3 $\pm$ 1.0 | 3.3 $\pm$ 0.9 | 2.7 $\pm$ 0.7 | 2.3 $\pm$ 0.3 |
| BOD <sub>7</sub> / TP                  | 34 $\pm$ 9    | 32 $\pm$ 7    | 27 $\pm$ 6    | 25 $\pm$ 3    |
| n                                      | 103           | 41            | 28            | 13            |

<sup>a</sup> Filtered through 0.45  $\mu$ m, Eurofins

**Table S2.** Operation of the AGS hydrolysis and bypass

| Operational parameter                                              | Period                                                                                                                                                                           |
|--------------------------------------------------------------------|----------------------------------------------------------------------------------------------------------------------------------------------------------------------------------|
| Hydrolysis was implemented by increasing sludge bed in pre-settler | 31 August 2019                                                                                                                                                                   |
| Time for hydrolysis in pre-settler was increased                   | 4 June – 15 July 2021                                                                                                                                                            |
| Recirculation in pre-settler (pump installed)                      | 11 May – 23 June 2020 and 14 January – 24 May 2021                                                                                                                               |
| No recirculation in pre-settler                                    | June 2020 – January 2021 and from May 2021 onwards                                                                                                                               |
| No bypassed flow to AGS                                            | 15 – 17 September 2020<br>29 October – 4 November 2020<br>21–25 January 2021<br>2–16 March 2021<br>2 June–21 July 2021<br>29 July–2 August 2021<br>01 October – 31 December 2021 |

**Table S3.** T-test p-values for paired effluent samples from AGS1 and AGS2 (June 2020 to September 2021).

| Parameter | BOD <sub>7</sub> | COD      | SS       | TP       | PO <sub>4</sub> <sup>3-</sup> -P | NH <sub>4</sub> <sup>+</sup> -N | NO <sub>3</sub> <sup>-</sup> -N |
|-----------|------------------|----------|----------|----------|----------------------------------|---------------------------------|---------------------------------|
| p-value   | 0.493353         | 0.574628 | 0.051834 | 0.949995 | 0.441061                         | 0.657089                        | 0.979494                        |

**Table S4.** T-test for paired effluent samples from AGS (average of AGS1 and AGS2) and the CAS, p-values and the mean concentrations (mg L<sup>-1</sup>) from June 2020 to September 2021.

| Parameter | BOD <sub>7</sub> | COD      | COD<br>soluble | SS       | TP       | PO <sub>4</sub> <sup>3-</sup> -P | NH <sub>4</sub> <sup>+</sup> -N | NO <sub>3</sub> <sup>-</sup> -N |
|-----------|------------------|----------|----------------|----------|----------|----------------------------------|---------------------------------|---------------------------------|
| p-value   | 0.00086          | 0.000392 | 0.000258       | 0.000273 | 0.016902 | 0.004904                         | 0.035835                        | 0.000318                        |
| AGS mean  | 6.3              | 53       | 35             | 17       | 0.64     | 0.35                             | 0.95                            | 5.4                             |
| CAS mean  | 3.1              | 35       | 32             | 6        | 1.2      | 1.004                            | 0.34                            | 8.4                             |

**Table S5.** p-values from Spearman's correlation test for relative abundance and temperature.

| p-value                | <i>Nitrospira</i> | <i>Ca. Nitrotoga</i> | <i>Nitrosomonas</i> | <i>Ca. Accumulibacter</i> | <i>Dechloromonas</i> | <i>Tetrasphaera</i> | <i>Propionivibrio</i> | <i>Ca. Competibacter</i> |
|------------------------|-------------------|----------------------|---------------------|---------------------------|----------------------|---------------------|-----------------------|--------------------------|
| <b>AGS1</b>            | 0.045             | 0.83                 | 0.40                | 0.0002                    | 0.012                | 0.72                | 0.0003                | 0.039                    |
| <b>AGS2</b>            | 0.11              | 0.0002               | 0.31                | 0.0002                    | 0.0001               | 0.77                | 0.003                 | 0.86                     |
| <b>CAS</b>             | 0.092             | 0.020                | 0.0001              | 0.89                      | 0.086                | 0.000003            | 0.003                 | 0.13                     |
| Spearman's coefficient |                   |                      |                     |                           |                      |                     |                       |                          |
| <b>AGS1</b>            | -0.43             |                      |                     | 0.71                      | 0.53                 |                     | 0.70                  | 0.44                     |
| <b>AGS2</b>            |                   | -0.71                |                     | 0.72                      | 0.72                 |                     | 0.61                  |                          |
| <b>CAS</b>             |                   | 0.49                 | -0.73               |                           |                      | 0.77                | 0.59                  |                          |

**Table S6.** Number of ASVs among PAOs, GAOs, AOB and NOB belonging to each major network module.

| Reactor | Module | Number of ASVs | PAOs | GAOs | AOB | NOB |
|---------|--------|----------------|------|------|-----|-----|
| AGS1    | AGS1_1 | 170            | 8    | 6    | 0   | 2   |
| AGS1    | AGS1_2 | 158            | 3    | 0    | 1   | 1   |
| AGS1    | AGS1_3 | 200            | 6    | 3    | 1   | 0   |
| AGS1    | AGS1_4 | 42             | 0    | 0    | 0   | 1   |
| AGS1    | AGS1_5 | 26             | 0    | 0    | 0   | 0   |
| AGS2    | AGS2_1 | 159            | 4    | 2    | 0   | 3   |
| AGS2    | AGS2_2 | 96             | 1    | 0    | 0   | 0   |
| AGS2    | AGS2_3 | 149            | 3    | 4    | 0   | 1   |
| AGS2    | AGS2_4 | 65             | 4    | 2    | 1   | 0   |
| AGS2    | AGS2_5 | 60             | 0    | 0    | 1   | 0   |
| CAS     | CAS_1  | 223            | 5    | 2    | 0   | 1   |
| CAS     | CAS_2  | 263            | 6    | 3    | 2   | 0   |
| CAS     | CAS_3  | 147            | 2    | 0    | 0   | 0   |
| CAS     | CAS_4  | 79             | 6    | 0    | 1   | 1   |

## Figures

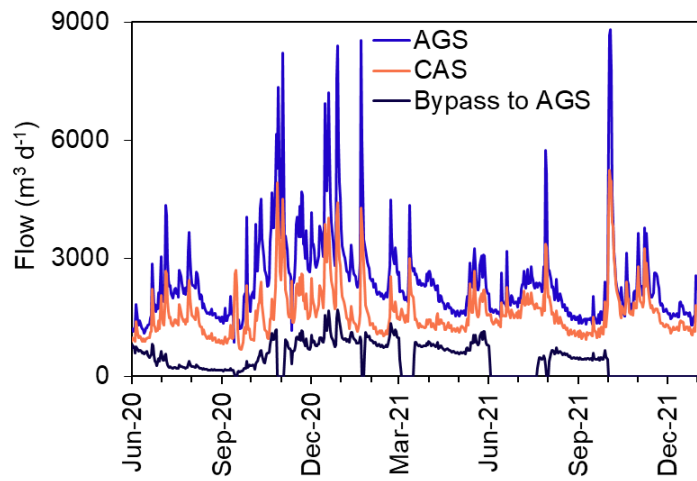

**Figure S1.** Flow to the AGS, CAS and bypassed flow to the AGS.

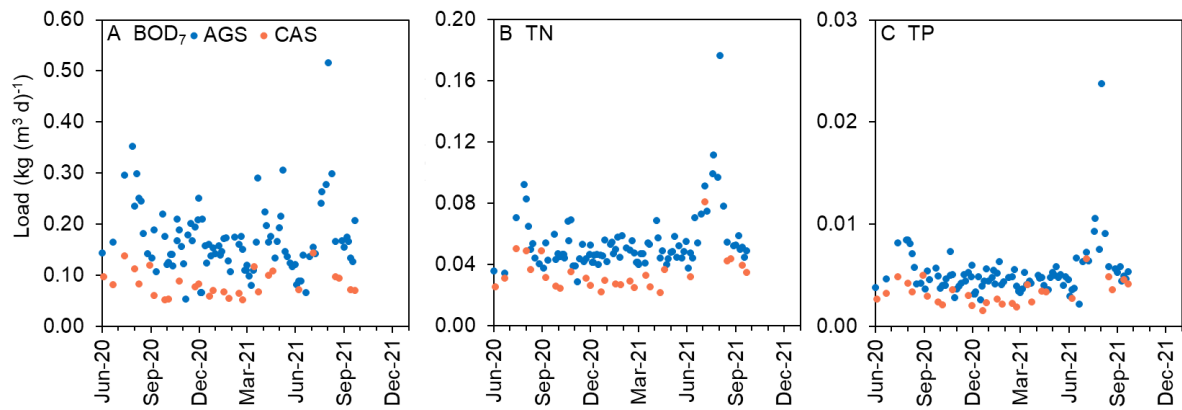

**Figure S2.** Volumetric load of A)  $\text{BOD}_7$ , B) TN, C) TP in the AGS and the CAS.

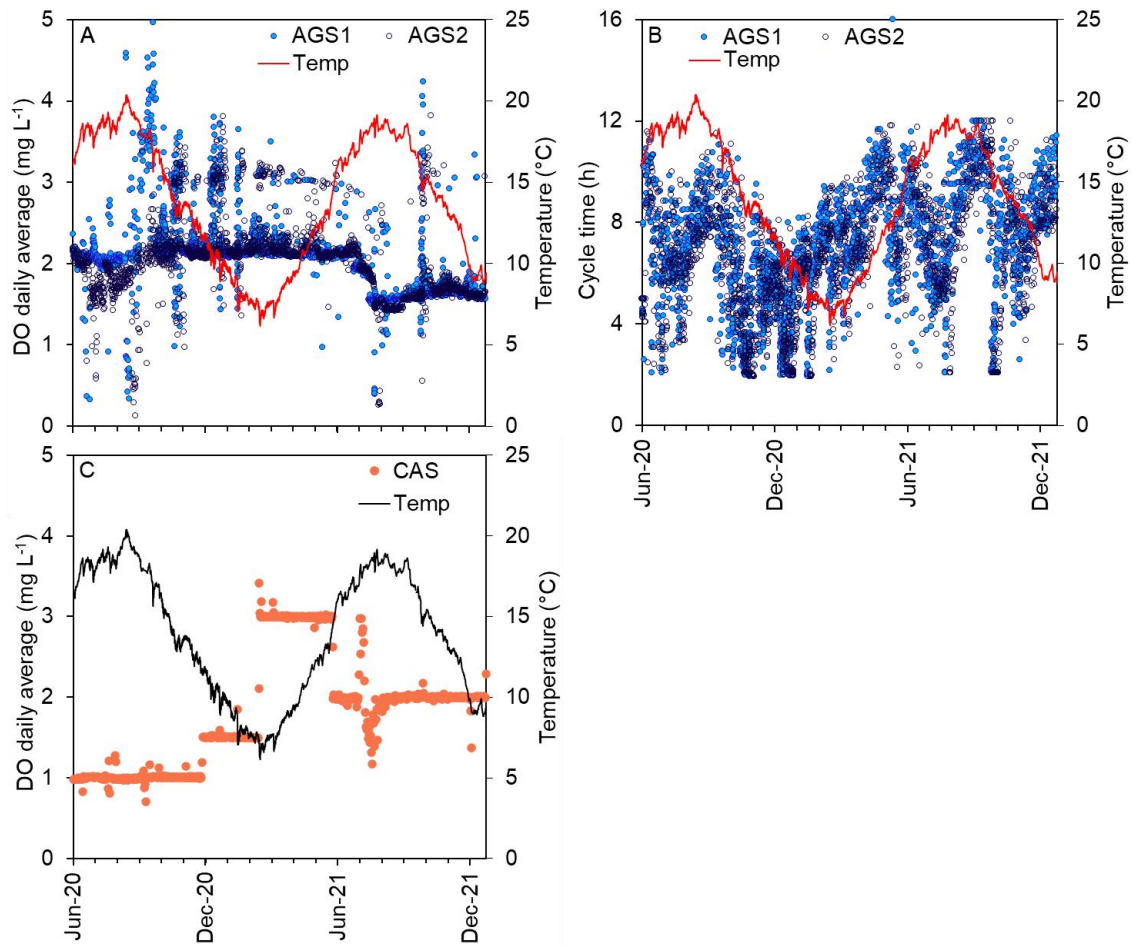

**Figure S3.** AGS daily average of A) DO and temperature, B) cycle time and temperature, C) CAS daily average DO and temperature (zone 4).

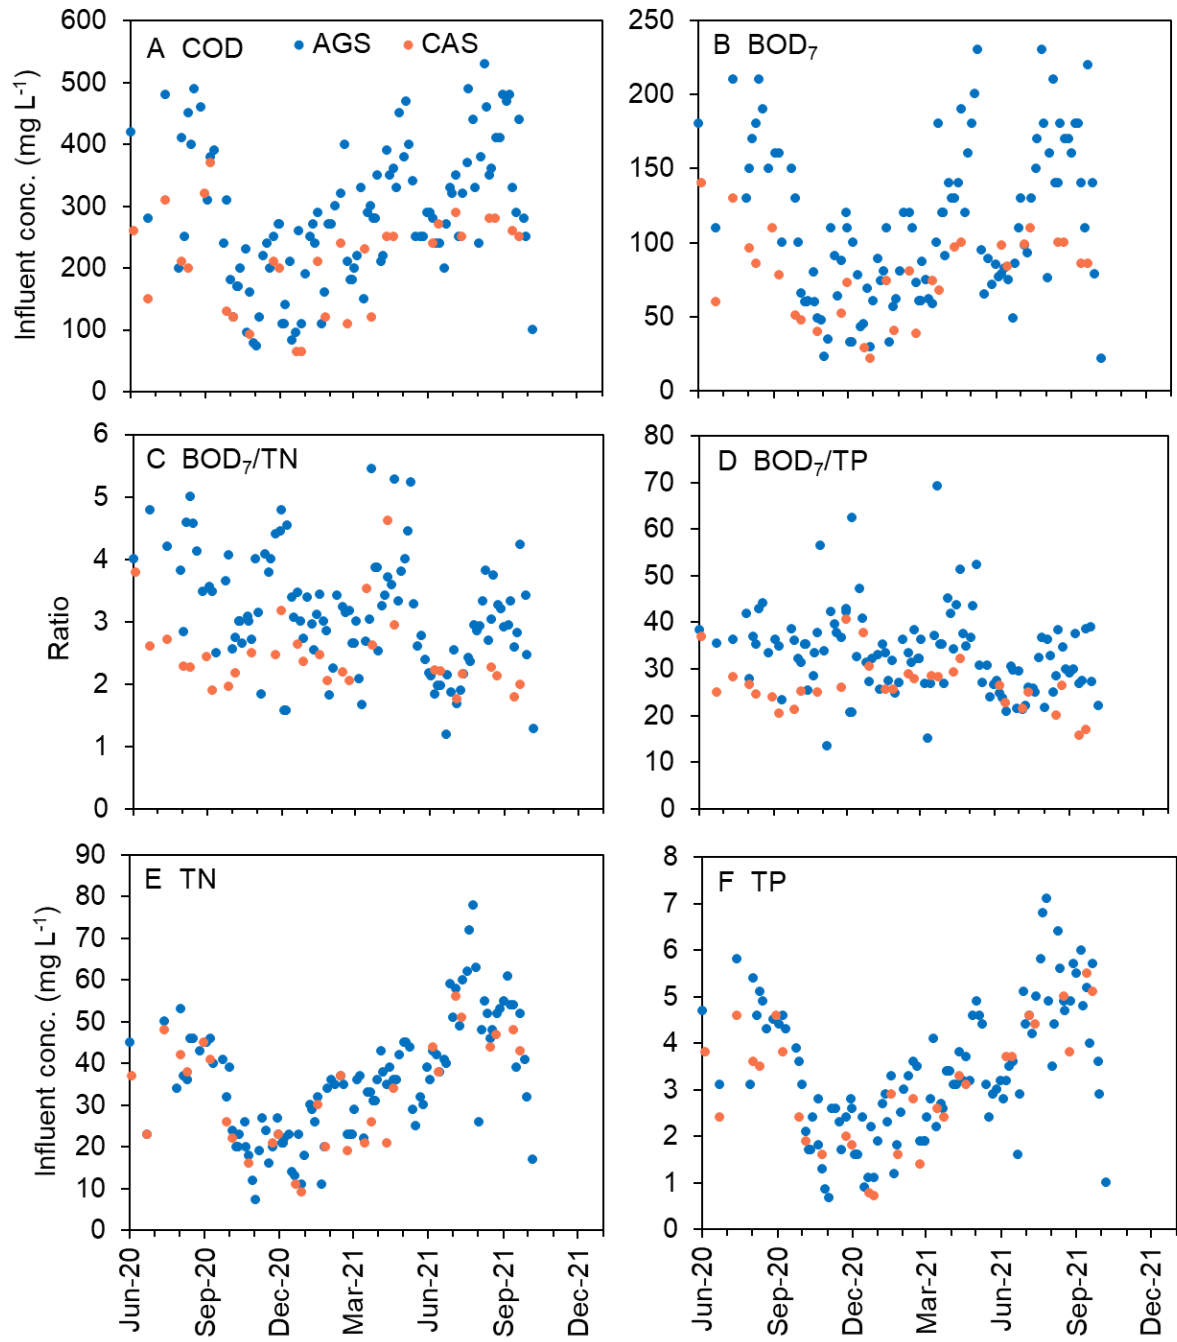

**Figure S4.** Influent concentrations or ratios of A) COD, B) BOD<sub>7</sub>, C) BOD<sub>7</sub>/TN, D) BOD<sub>7</sub>/TP, E) TN, and F) TP.

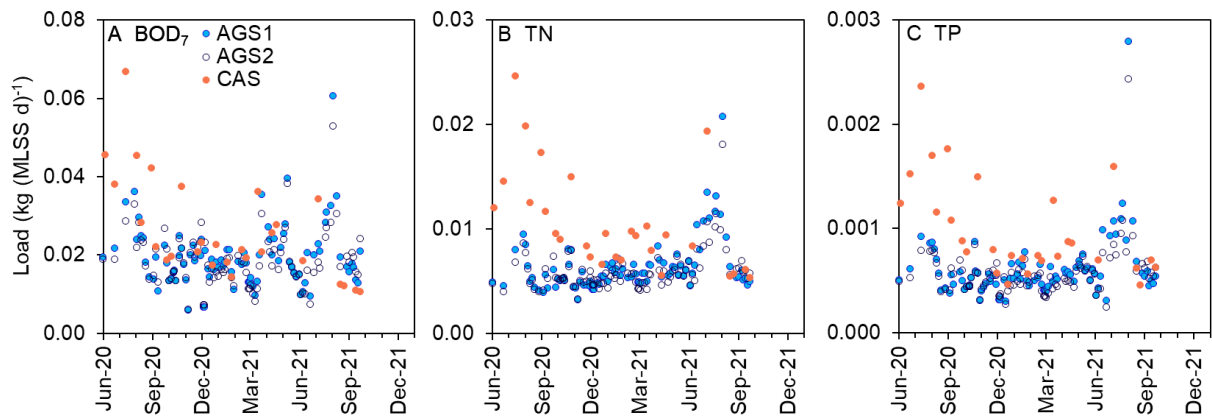

**Figure S5.** Biomass specific load of A) BOD<sub>7</sub>, B) TN, C) TP in AGS1, AGS2, and the CAS.

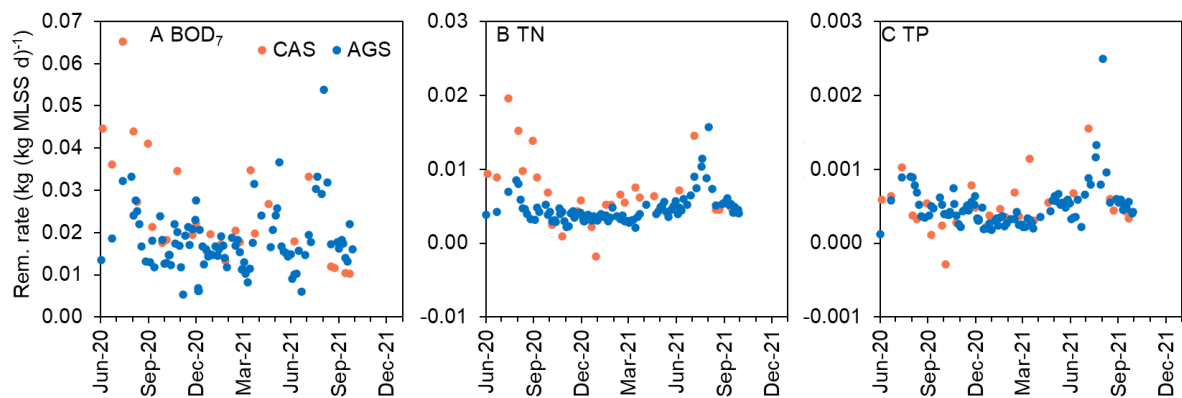

**Figure S6.** Biomass specific removal rates of A) BOD<sub>7</sub>, B) TN, C) TP in the AGS and the CAS.

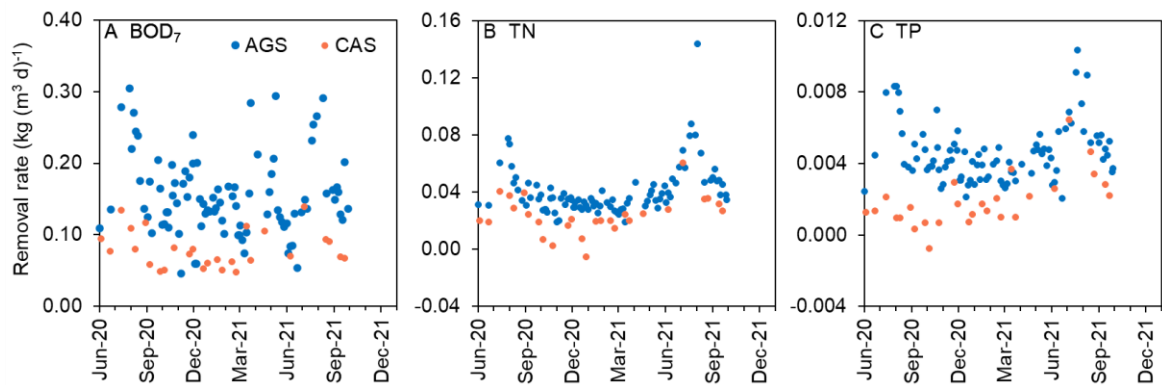

**Figure S7.** Volumetric removal rates of A) BOD<sub>7</sub>, B) TN, C) TP in the AGS and the CAS.

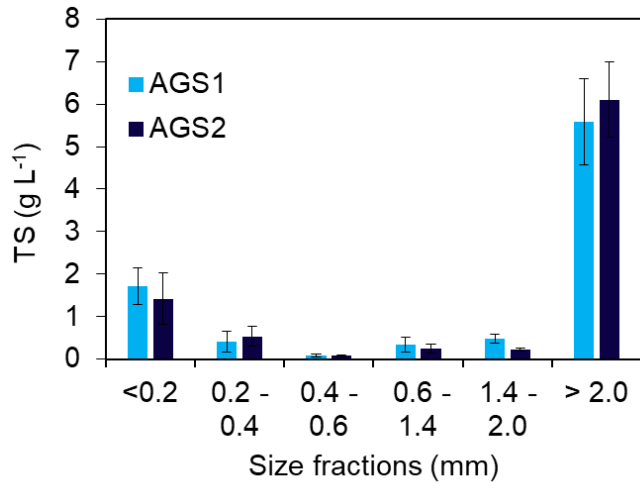

**Figure S8.** Aggregates average size distribution in AGS1 and AGS2.

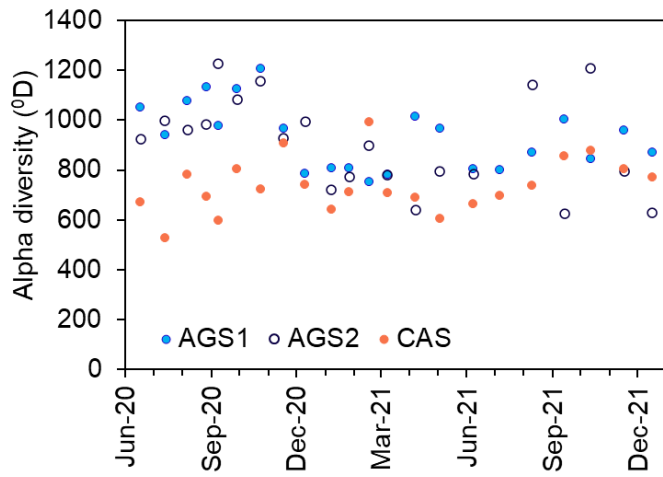

**Figure S9.** Alpha diversity over time (q=0).



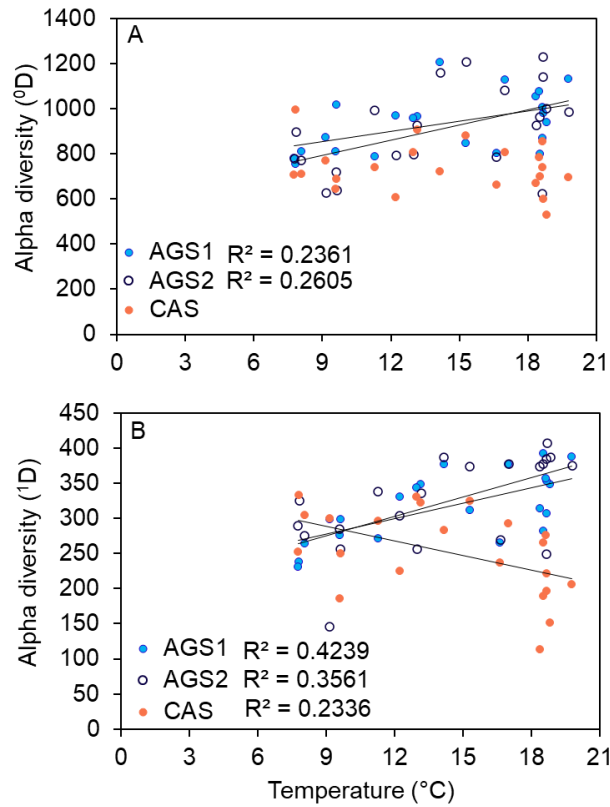

**Figure S10.** Alpha diversity for A)  $q=0$  and B)  $q=1$ , plotted in relation to the temperature.  $R^2$  is given for correlations with  $p < 0.05$ .

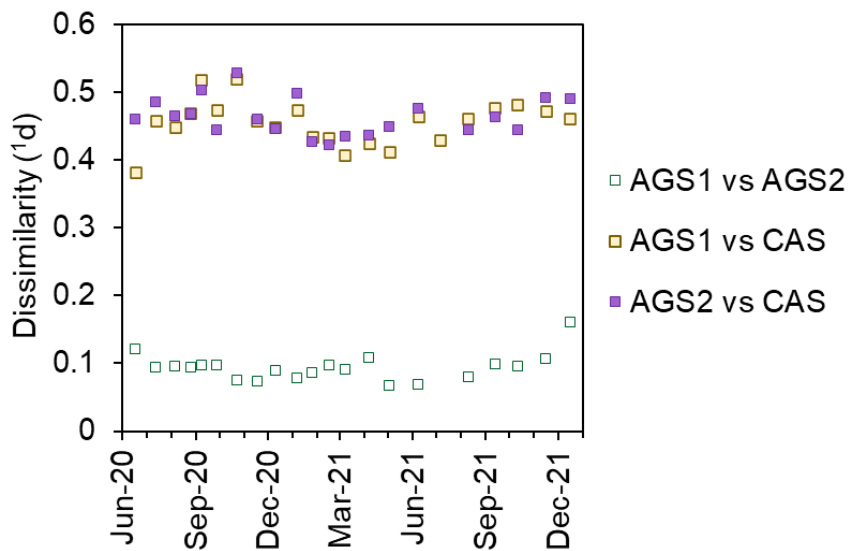

**Figure S11.** Dissimilarity ( $q=1$ ) between samples taken the same day from the CAS and AGS1, and AGS2.

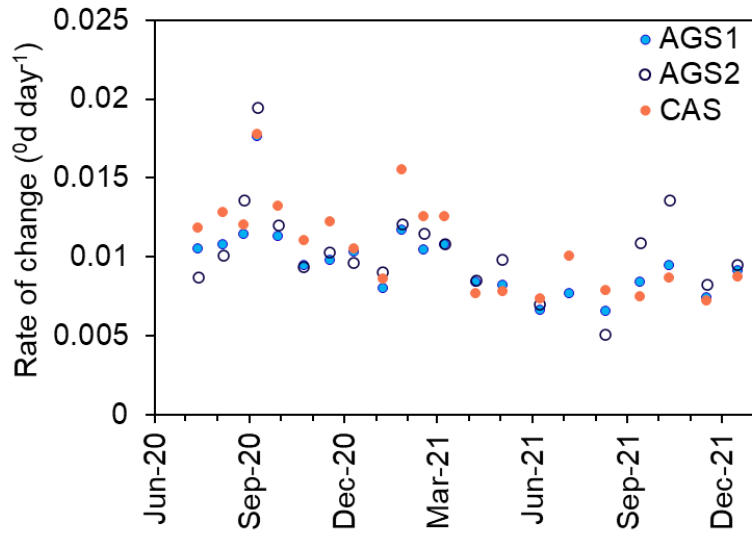

**Figure S12.** The rate of change in dissimilarity ( $q=0$ ).

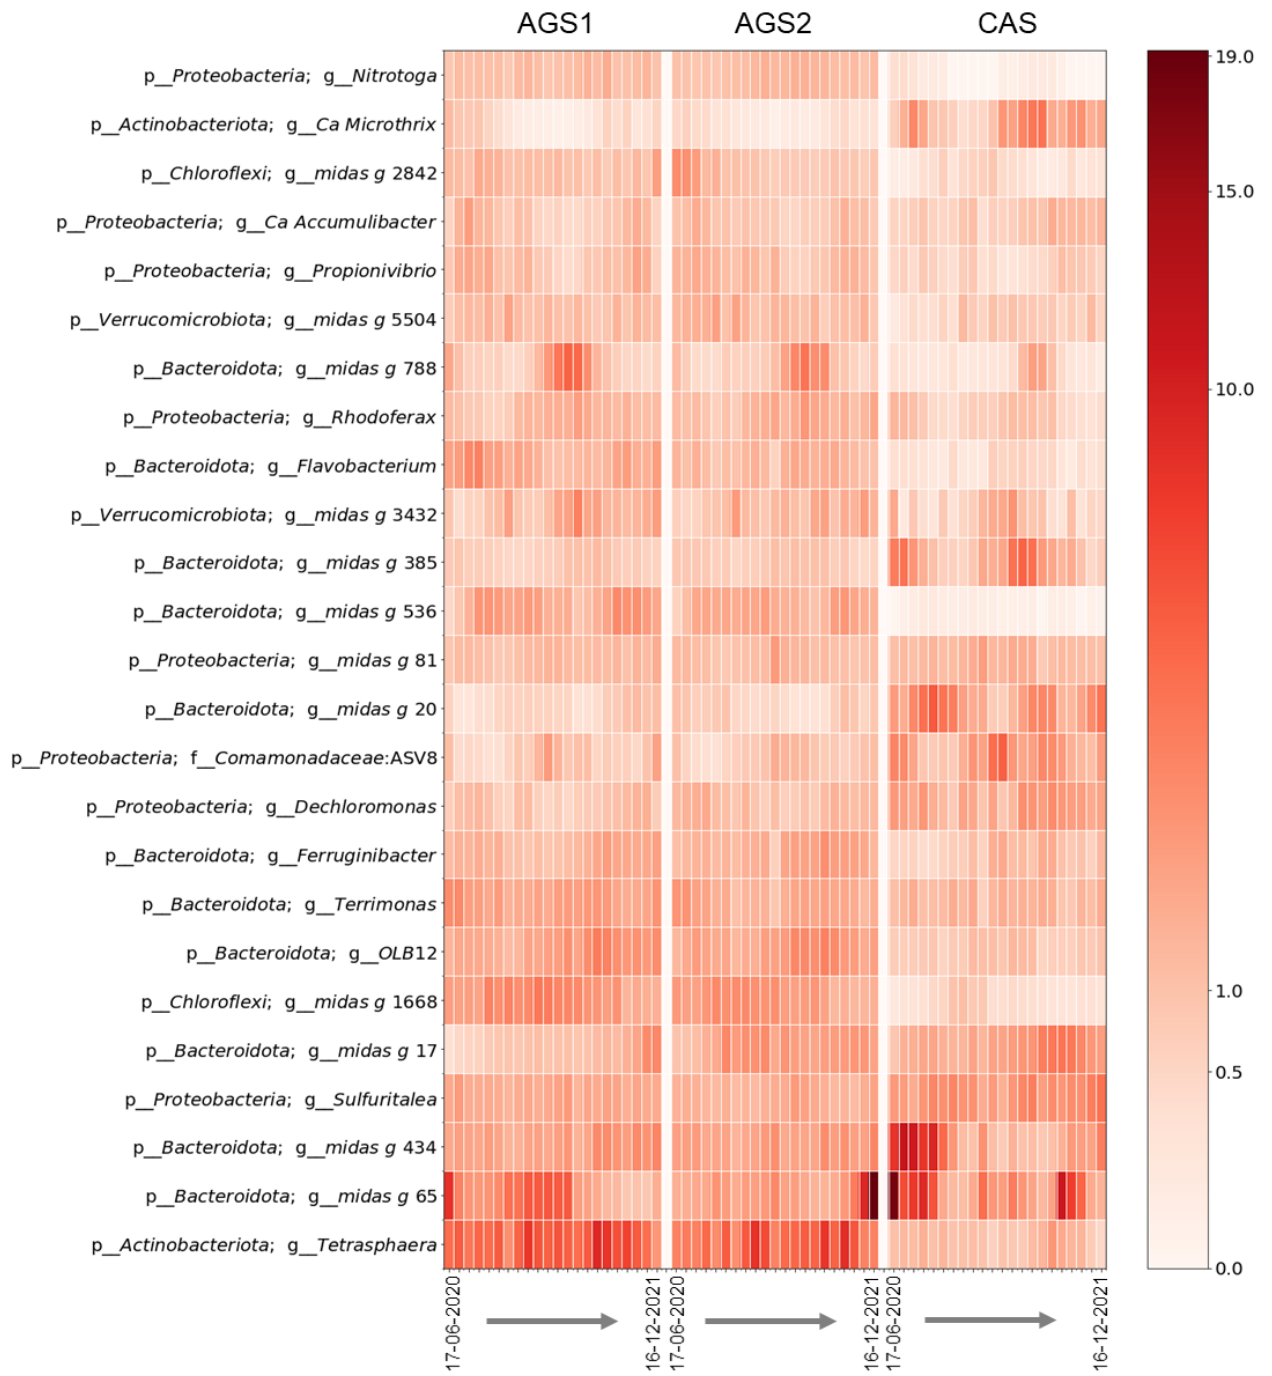

**Figure S13.** Heatmap of the 20 most abundant in genera AGS1, AGS2, and the CAS.

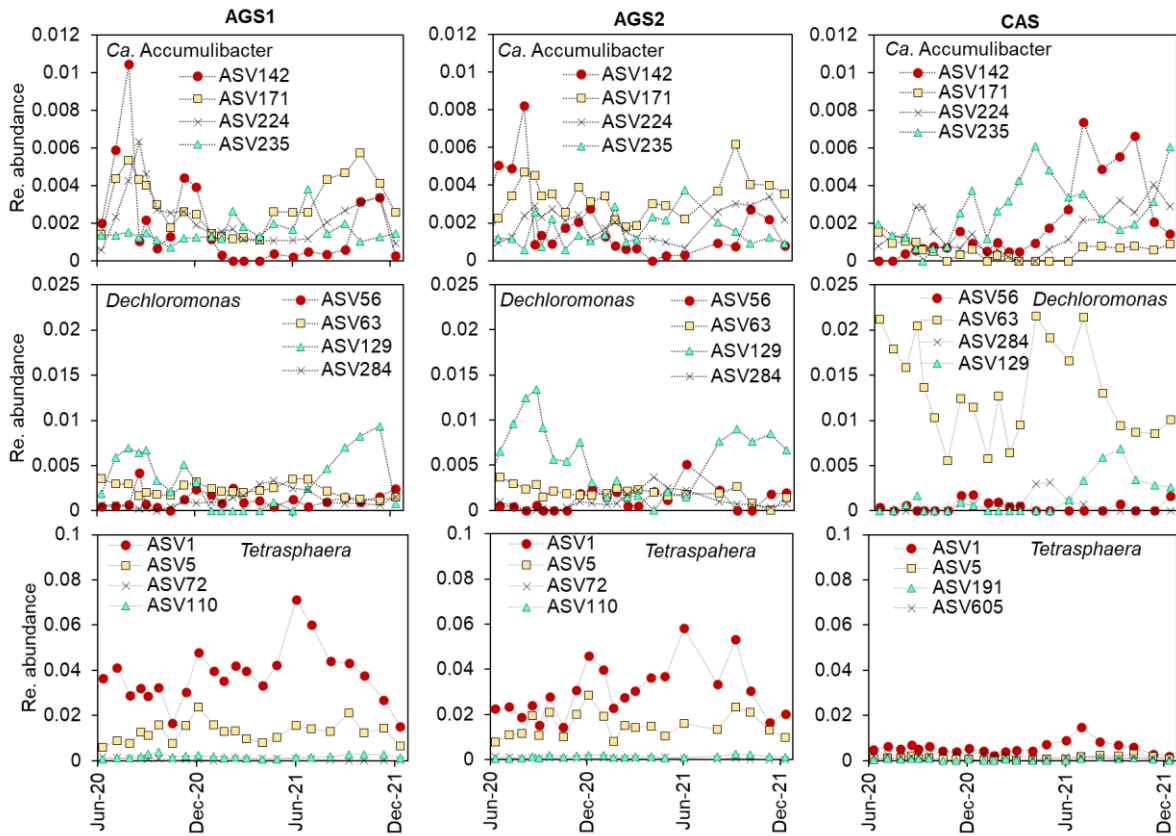

**Figure S14.** Relative abundance of *Ca. Accumulibacter*, *Dechloromonas* and *Tetrasphaera* in AGS1, AGS2 and CAS.

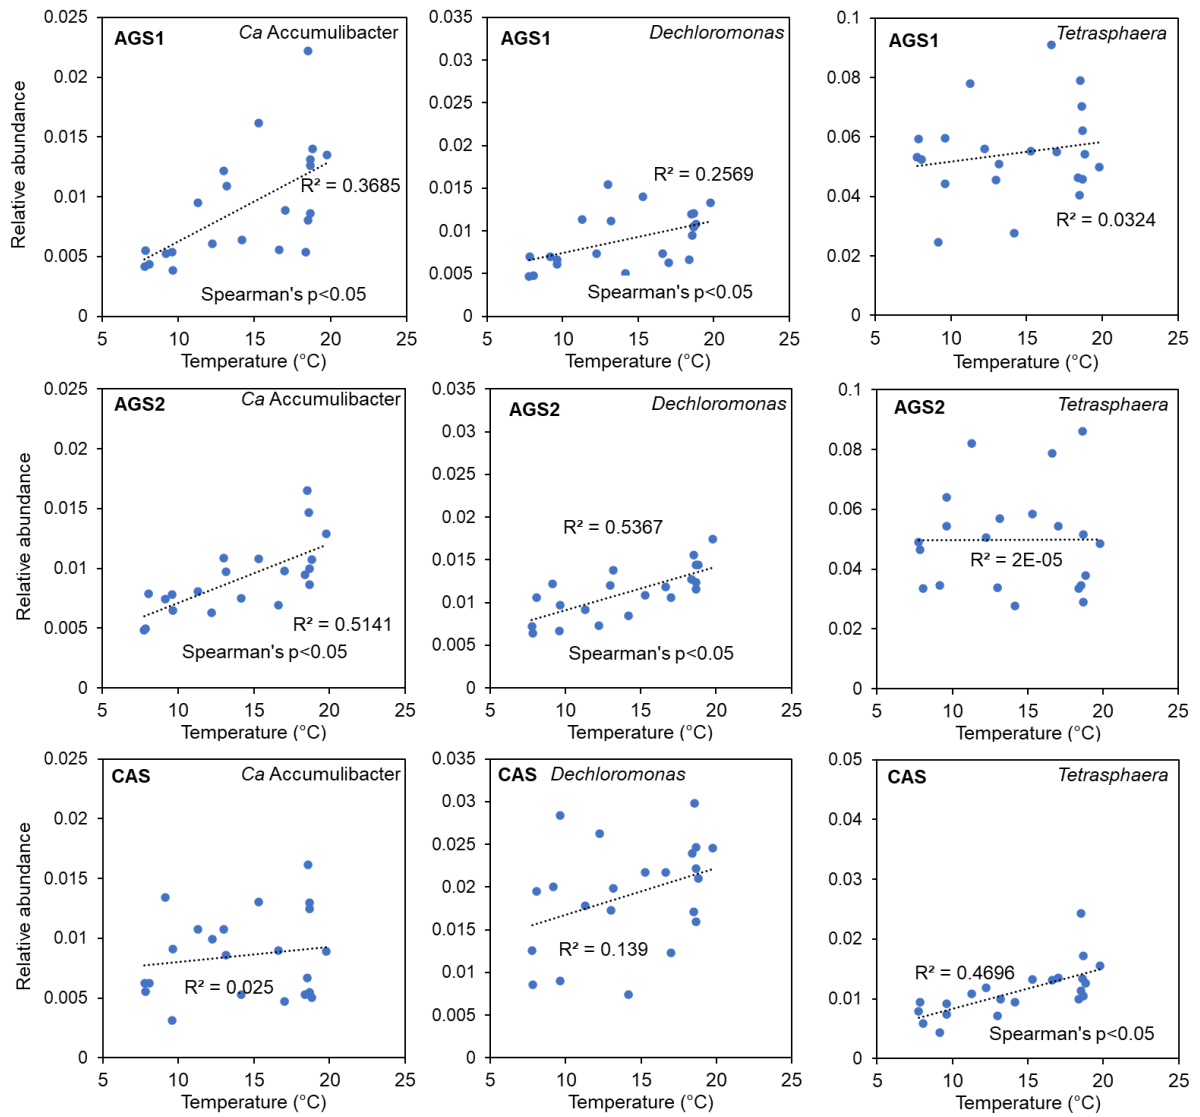

**Figure S15.** Plotted correlations of relative abundance and temperature for PAOs in AGS1, AGS2 and CAS. Significant correlations calculated with Spearman's correlation test are indicated for  $p < 0.05$  (See Table S5).

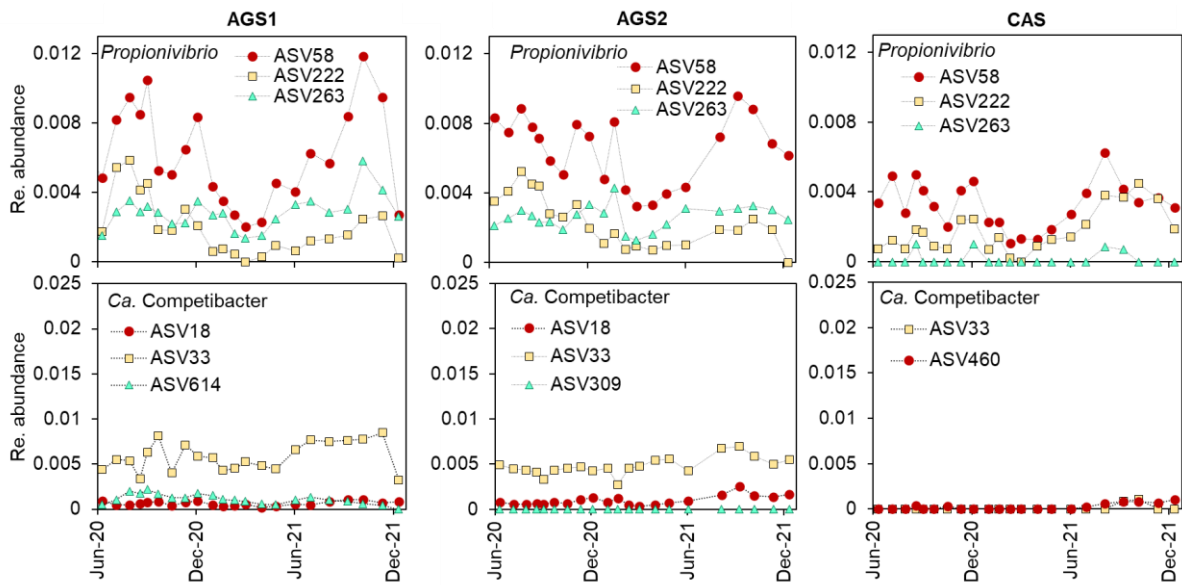

**Figure S16.** Relative abundance of *Propionivibrio* and *Ca. Competibacter* in AGS1, AGS2 and CAS. \*One sample was not shown in this plot as the relative abundance was very high (0.1) compared with the other samples, for *Ca. Competibacter* in AGS2.

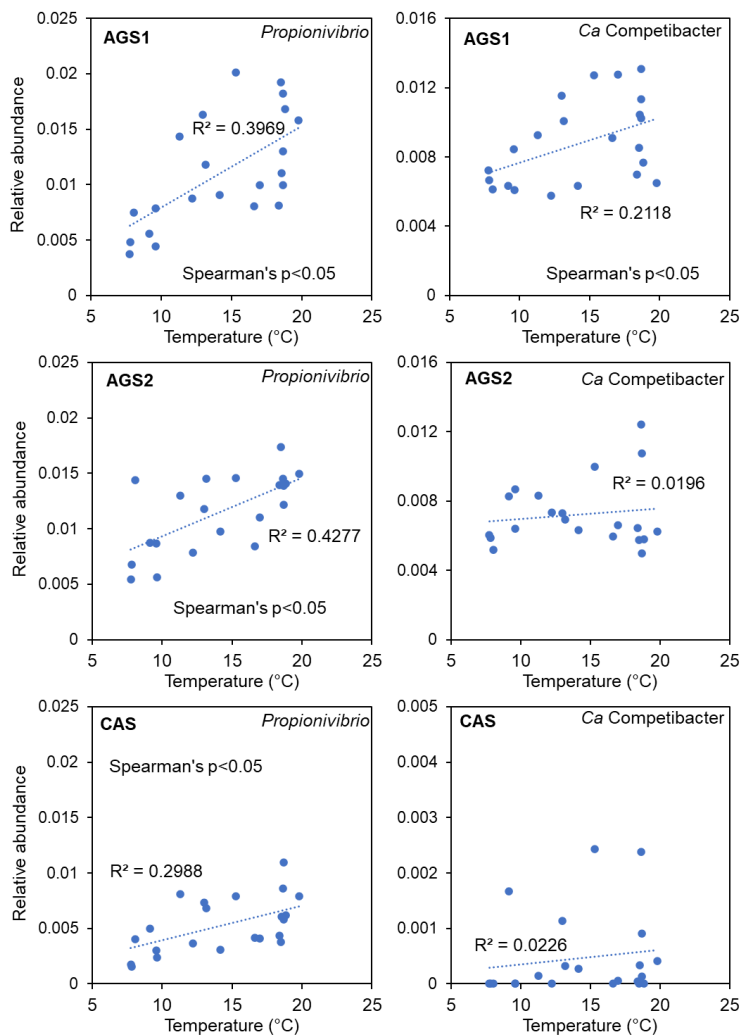

**Figure S17.** Plotted correlations of relative abundance and temperature for GAOs in AGS1, AGS2 and CAS. Significant correlations calculated with Spearman's correlation test are indicated for p < 0.05 (See Table S5).

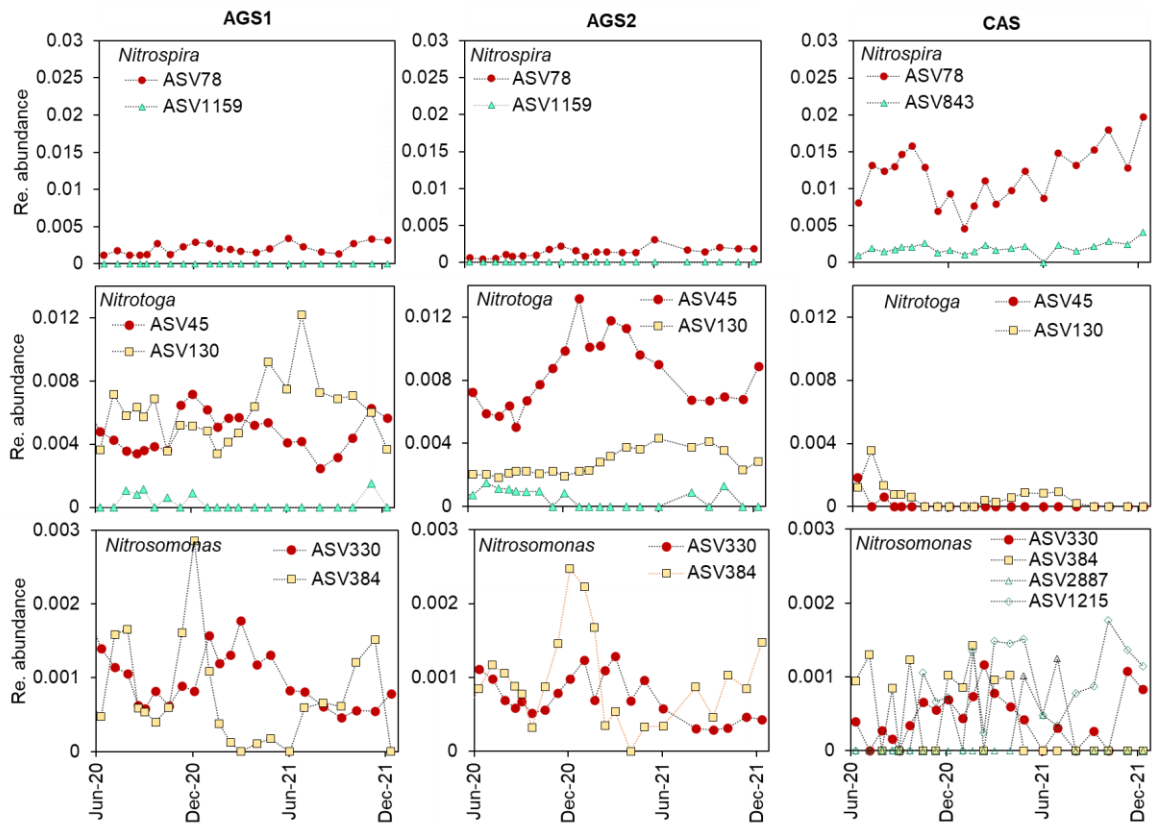

**Figure S18.** Relative abundance of *Nitrospira*, *Nitrotoga* and *Nitrosomonas* in AGS1, AGS2 and CAS.

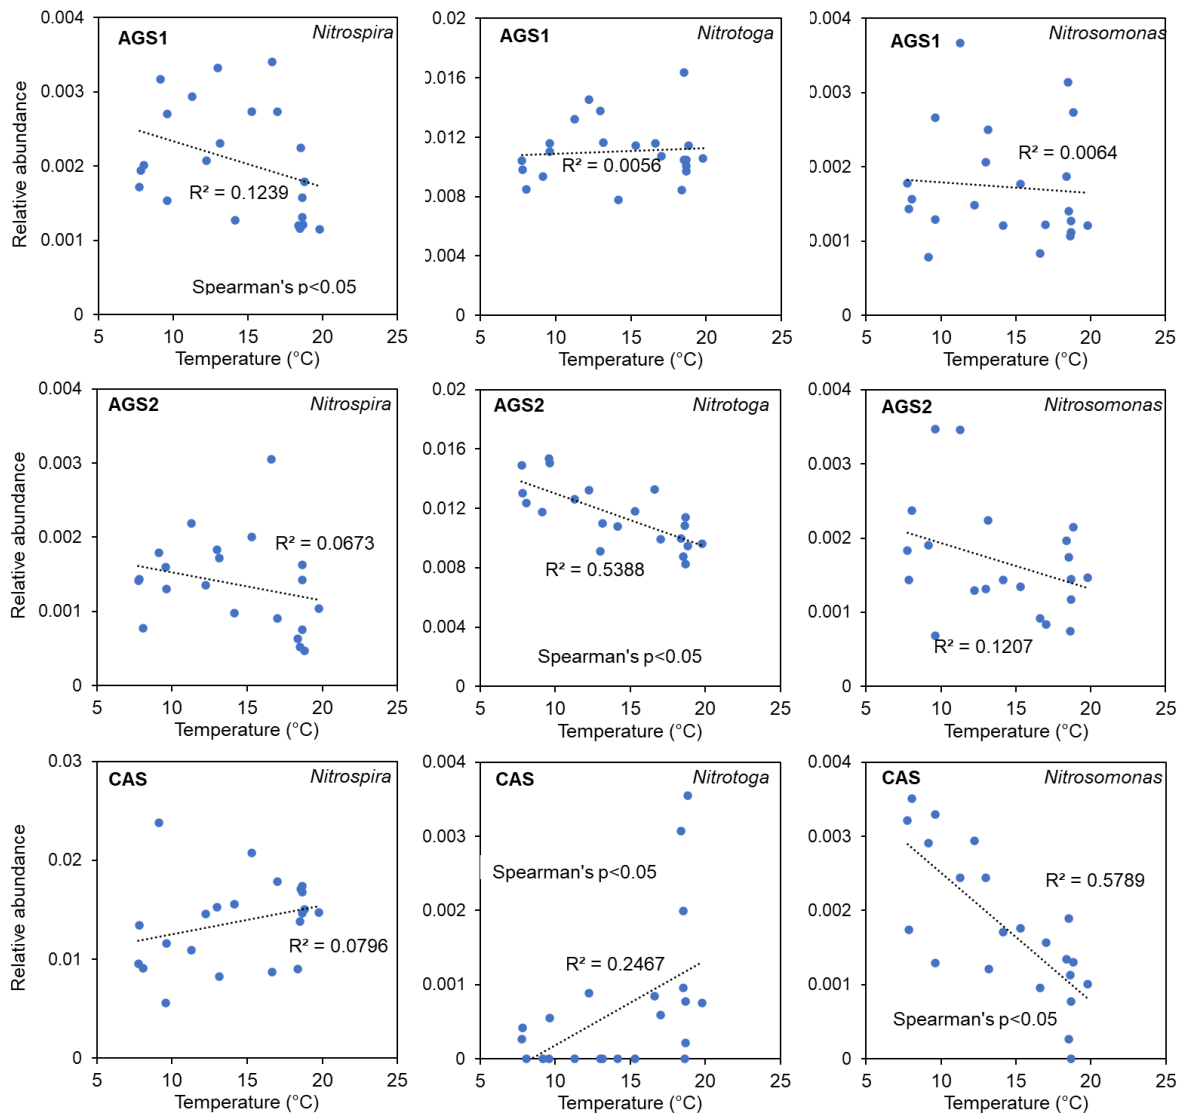

**Figure S19.** Plotted correlations of relative abundance and temperature for AOB and NOB in AGS1, AGS2 and CAS. Significant correlations calculated with Spearman's correlation test are indicated for  $p < 0.05$  (See Table S5).

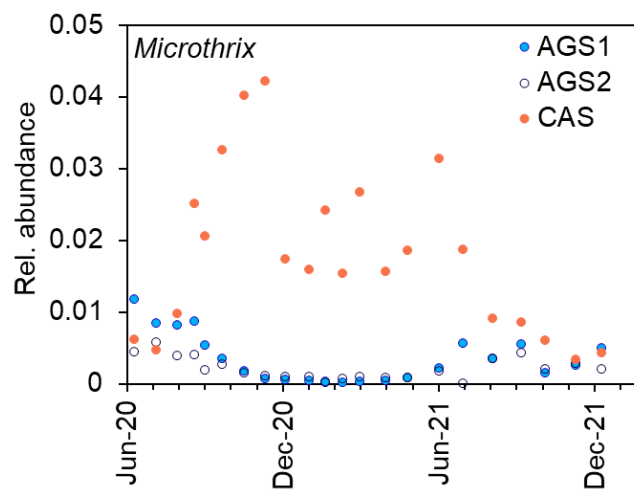

**Figure S20.** Relative abundance of *Microthrix* in the reactors.
